# Supplementary material
Source: publisher figshare collection journal article supplement (https://tandf.figshare.com/ndownloader/files/37575926)
Supplement: Supplementary file 1 [file 37575926]

**Supplemental Table 1.** Rank correlations, intraclass correlation coefficients and kappa statistics for patient- physician and physician-physician pairs of scores on IBD questionnaires, results presented separated for observations at first and at second timepoint

| **Questionnaire** | **Patients–Senior physician** | | **Patients–Junior physicians** | | **Senior–Junior physicians** | |
| --- | --- | --- | --- | --- | --- | --- |
|  | **First** | **Second** | **First** | **Second** | **First** | **Second** |
| **HBI** |  |  |  |  |  |  |
| Number of pairs | 263 | 79 | 79 | 13 | 104 | 20 |
| Rho (95% CI) | 0.737 (0.676-0.788) | 0.611 (0.451-0.733) | 0.700 (0.567-0.798) | 0.541 (0-0.841) | 0.837 (0.769-0.887) | 0.710 (0.390-0.877) |
| P value | <0.0001 | <0.0001 | <0.0001 | 0.039 | <0.0001 | 0.0005 |
| ICC (95% CI) | 0.752 (0.682-0.806) | 0.610 (0.417-0.744) | 0.639 (0.487-0.753) | 0.356 (-0.254 to 0.751) | 0.853 (0.750-0.891) | 0.925 (0.818-0.970) |
| Kappa (95% CI) | 0.626 (0.530-0.721) | 0.437 (0.236-0.638) | 0.545 (0.362-0.729) | 0.264 (-0.350 to 0.878) | 0.672 (0.532-0.811) | 1.000 (1.000-1.000) |
| **SCCAI** |  |  |  |  |  |  |
| Number of pairs | 253 | 85 | 71 | 8 | 88 | 16 |
| Rho (95% CI) | 0.741 (0.680-0.792) | 0.701 (0.574-0.795) | 0.704 (0.563-0.805) | 0.636 (-0.124 to 0.926) | 0.906 (0.860-0.938) | 0.782 (0.467-0.921) |
| P value | <0.0001 | <0.0001 | <0.0001 | 0.09 | <0.0001 | 0.0003 |
| ICC (95% CI) | 0.736 (0.660-0.795) | 0.754 (0.645-0.833) | 0.672 (0.485-0.793) | 0.585 (-0-030 to 0.896) | 0.913 (0.870-0.942) | 0.831 (0.582-0.938) |
| Kappa (95% CI) | 0.620 (0.515-0.726) | 0.554 (0.302-0.806) | 0.500 (0.294-0.706) | 0.600 (-0.072 to 1.000) | 0.732 (0.570-0.895) | 0.455 (-0.063 to 0.972) |
| **PRISM** |  |  |  |  |  |  |
| Number of pairs | 489 | 161 | 140 | 20 | 191 | 36 |
| Rho (95% CI) | 0.410 (0.334-0.481) | 0.365 (0.223-0.492) | 0.527 (0.396-0.637) | 0.259 (-0.208 to 0.629) | 0.763 (0.696-0.816) | 0.324 (-0.005 to 0.590) |
| P value | <0.0001 | <0.0001 | <0.0001 | 0.290 | <0.0001 | 0.074 |
| ICC (95% CI) | 0.309 (0.152-0.438) | 0.275 (0.090-0.435) | 0.449 (0.293-0.579) | 0.089 (-0.126 to 0.386) | 0.777 (0.714-0.828) | 0.248 (-0.073 to 0.526) |
| Kappa (95% CI) | 0.185 (0.119-0.251) | 0.151 (0.033-0.269) | 0.306 (0.169-0.443) | 0.000 | 0.590 (0.464-0.715) | -0.080 (-0.160 to -0.001) |

HBI, Harvey-Bradshaw Index; SCCAI, Simple Clinical Colitis Activity Index; PRISM, Pictorial Representation of Illness and Self Measure; Rho: Spearman’s rho; CI, confidence interval; ICC, intraclass correlation coefficient
